# Supplementary material for: Robust, Flame-Retardant, and Anti-Corrosive Waterborne Polyurethane Enabled by a PN Synergistic Flame-Retardant Containing Benzimidazole and Phosphinate Groups
Source: MDPI journal article supplement (doi:10.3390/polym15102400), 2023-05-22
Supplement: s1 [file s1]

## Supporting information

### Robust, Flame-Retardant and Anti-Corrosive Waterborne Polyurethane Enabled by a P–N Synergistic Flame Retardant Containing Benzimidazole and Phosphinate Groups

Li-Ping Zhang, Zhen-Guo Zhao, Yuan-Yuan Huang, Chang-Jian Zhu, Xing Cao, Yan-Peng Ni\*

*Institute of Functional Textiles and Advanced Materials, Qingdao Key Laboratory of Flame-Retardant Textile materials, National Engineering Research Center for Advanced Fire-Safety Materials D & A (Shandong), State Key Laboratory of Bio-Fibers and Eco-textiles, College of Textiles & Clothing, Qingdao University, Qingdao 266071, China.*

*E-mail: polyester-niyanpeng@qdu.edu.cn*

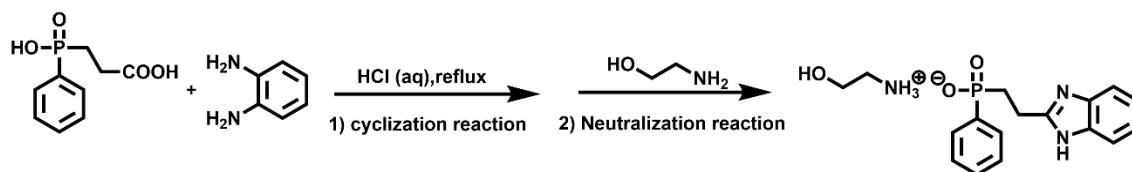

**Scheme S1.** Synthetic route for BIEP-ETA.

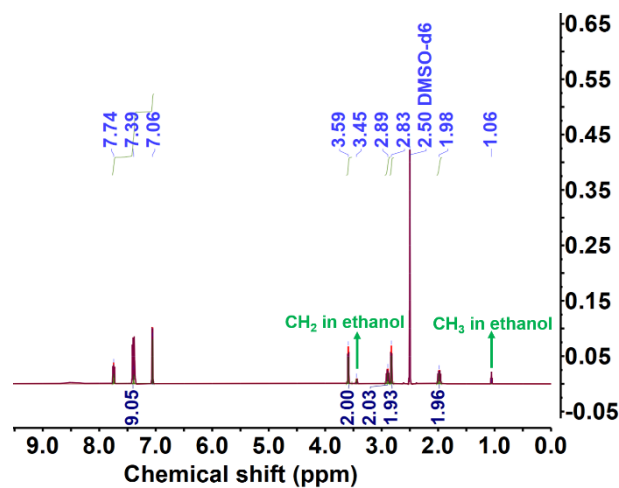

**Figure S1.**  $^1\text{H}$  NMR spectra of BIEP-ETA.

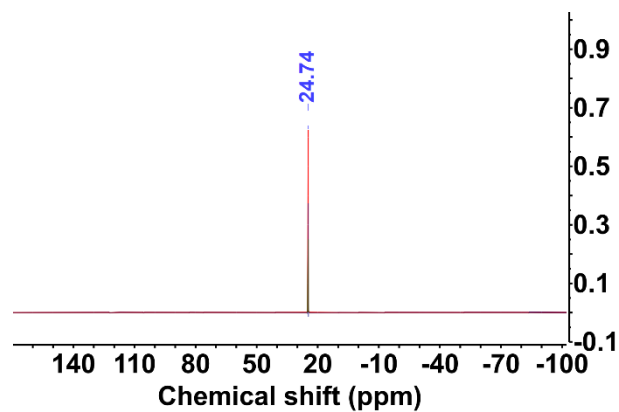

**Figure S2.**  $^{31}\text{P}$  NMR spectra of BIEP-ETA.

**Table S1** Data from DSC and DMA tests of WPU-0 and WPU/FRs.

| Sample  | DSC                              |                                  | DMA                              |                                                 |
|---------|----------------------------------|----------------------------------|----------------------------------|-------------------------------------------------|
|         | $T_{g,s}$ ( $^{\circ}\text{C}$ ) | $T_{g,s}$ ( $^{\circ}\text{C}$ ) | $T_{g,h}$ ( $^{\circ}\text{C}$ ) | Storage Modulus at -60 $^{\circ}\text{C}$ (MPa) |
| WPU-0   | -54.6                            | -43.4                            | 7.01                             | 1746                                            |
| WPU/FR5 | -54.4                            | -43.1                            | 6.68                             | 2413                                            |
| WPU/FR7 | -54.1                            | -43.6                            | 21.50                            | 3367                                            |
| WPU/FR9 | -54.5                            | -44.2                            | 21.90                            | 3143                                            |

**Table S2** Data from TGA test of WPU-0 and WPU/FRs.

| Sample  | $T_{5\%}$ (°C) | $T_{\max 1}$ (°C) | $T_{\max 2}$ (°C) | $R_{700}$ (wt%) |
|---------|----------------|-------------------|-------------------|-----------------|
| WPU-0   | 266.1          | 282.7             | 366.8             | 0               |
| WPU/FR5 | 261.8          | 320.1             | 381.7             | 0.31            |
| WPU/FR7 | 258.6          | 322.7             | 379.3             | 0.32            |
| WPU/FR9 | 255.2          | 294.3             | 377.6             | 0.25            |

**Table S3** Tafel polarization data of coated and uncoated tinplate in 3.5% NaCl.

| Sample   | $I_{\text{corr}}$ (A/cm <sup>2</sup> ) | $E_{\text{corr}}$ (V) |
|----------|----------------------------------------|-----------------------|
| Tinplate | $3.27 \times 10^{-5}$                  | -1.45                 |
| WPU-0    | $4.58 \times 10^{-6}$                  | -0.83                 |
| WPU/FR5  | $1.05 \times 10^{-7}$                  | -0.63                 |
| WPU/FR7  | $7.74 \times 10^{-8}$                  | -0.57                 |
| WPU/FR9  | $3.80 \times 10^{-8}$                  | -0.50                 |
